# Supplementary material for: Guidance of super-enhancers in regulation of IL-9 induction and airway inflammation
Source: PubMed Central journal article supplement — J Exp Med. 2018 Feb 5;215(2):559–74. doi: 10.1084/jem.20170928 (PMC5789412; doi:10.1084/jem.20170928), 2018-02-05
Supplement: JEM_20170928_sm.pdf [file JEM_20170928_sm.pdf]

## SUPPLEMENTAL MATERIAL

Xiao et al., <https://doi.org/10.1084/jem.20170928>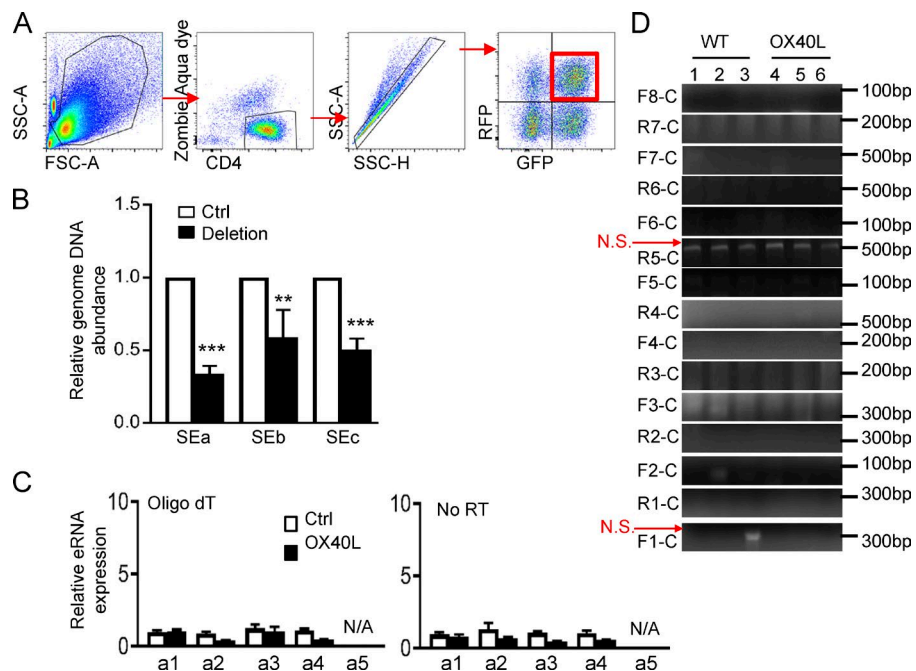

Figure S1. **CRISPR/Cas9 strategy in deletion of I19 SE in activated CD4<sup>+</sup> T cells.** **(A)** Gating strategy for FACS analysis after transduction of activated Cas9 transgenic CD4<sup>+</sup> T cells with a pair of sgRNA flanking a designated SE region for deletion. The retroviral vectors carrying the sgRNA are marked by GFP and RFP, respectively, so live CD4<sup>+</sup> T cells expressing both GFP and RFP markers were selectively gated for further analysis. **(B)** Deletion efficiency by the Cas9/sgrNA method in primary T cells, normalized against the I19 coding region. Data are pooled from four independent experiments (mean and SD of  $n = 4$ ). \*\*,  $P < 0.01$ ; and \*\*\*,  $P < 0.001$ . **(C)** Quantitative real-time PCR analysis of eRNA expression from the I19 SEa region using different primer sets. Left: The oligo dT primer (specific for mRNA) was used for reverse transcription. Right: No reverse transcription of RNA to cDNA. Data shown are mean  $\pm$  SEM of three independent experiments with triplicate cultures. **(D)** 3C assays measuring chromatin loop formations using all primer combinations as indicated in Fig. 4 E, except the R8 and C primer set. N.S., nonspecific. Data are representative of three independent experiments.

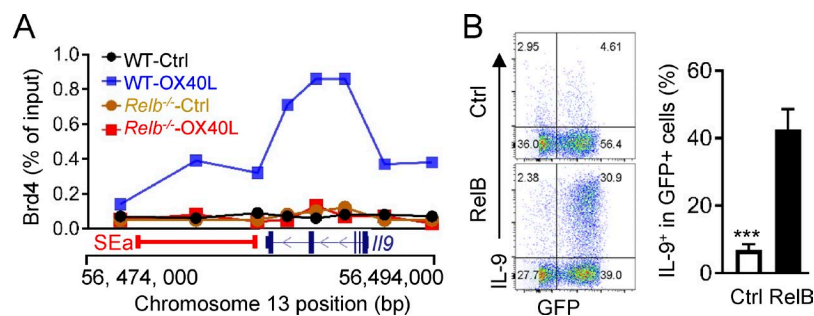

Figure S2. **Role of RelB in I19 SE formation.** **(A)** ChIP data showing selective enrichment of Brd4 at the SEa and the I19 coding region in WT and Relb<sup>-/-</sup> Th9 cells induced with or without OX40 stimulation. Brd4 failed to bind to such regions in the absence of RelB. Data are representative of two independent experiments. **(B)** FACS plots and quantification of Th9 cells induced from WT CD4<sup>+</sup> T cells transduced with empty vector (Ctrl) or retroviral vector expressing full-length RelB (RelB), after 3 d of culture with TGF- $\beta$  and IL-4 (Th9 cell conditions). The retroviral vector also has a GFP marker for identification. Thus IL-9-producing cells in the GFP<sup>+</sup> fraction were selected for analysis. Graphs depict mean  $\pm$  SEM of 10 experiments with triplicate cultures. \*\*\*,  $P < 0.001$ .

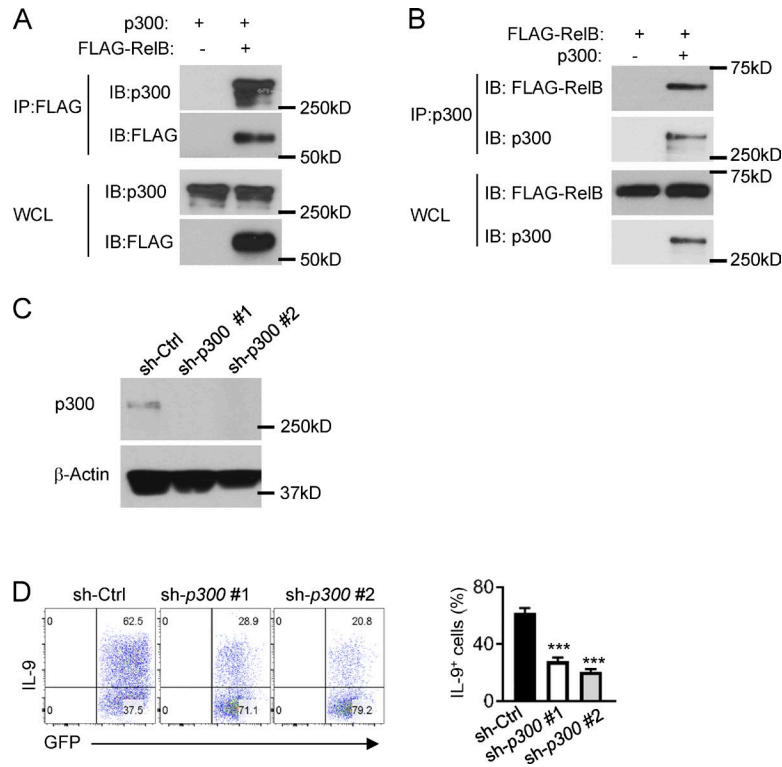

Figure S3. **Critical role of p300 in the formation of IL9 SEs.** (A and B) Coimmunoprecipitation experiments assessing RelB and p300 interactions in 293T cells. FLAG-tagged RelB and p300 were transduced to 293T cells, followed by immunoprecipitation of RelB with anti-FLAG. The immunoblots show the presence of p300 in the RelB immunoprecipitates (A). p300 was immunoprecipitation from 293 T cells using anti-p300, and RelB was detected by immunoblot using anti-FLAG (B). Data are representative of three independent experiments. (C) Immunoblot showing the knockdown efficiency of p300 using shRNA specifically targeting p300 in activated CD4<sup>+</sup> T cells.  $\beta$ -Actin was used as a housekeeping control. Data are representative of three independent experiments. (D) FACS plots showing Th9 cell induction from activated CD4<sup>+</sup> T cells transduced with empty vector (sh-Ctrl) or retroviral vector expressing p300 specific shRNA and cultured under Th9 cell-polarizing conditions in the presence of OX40 stimulation. The bar graphs on the right show summary of Th9 cells with or without the p300 knockdown. Graphs depict mean  $\pm$  SEM of five experiments with triplicate cultures. \*\*\*,  $P < 0.001$ .

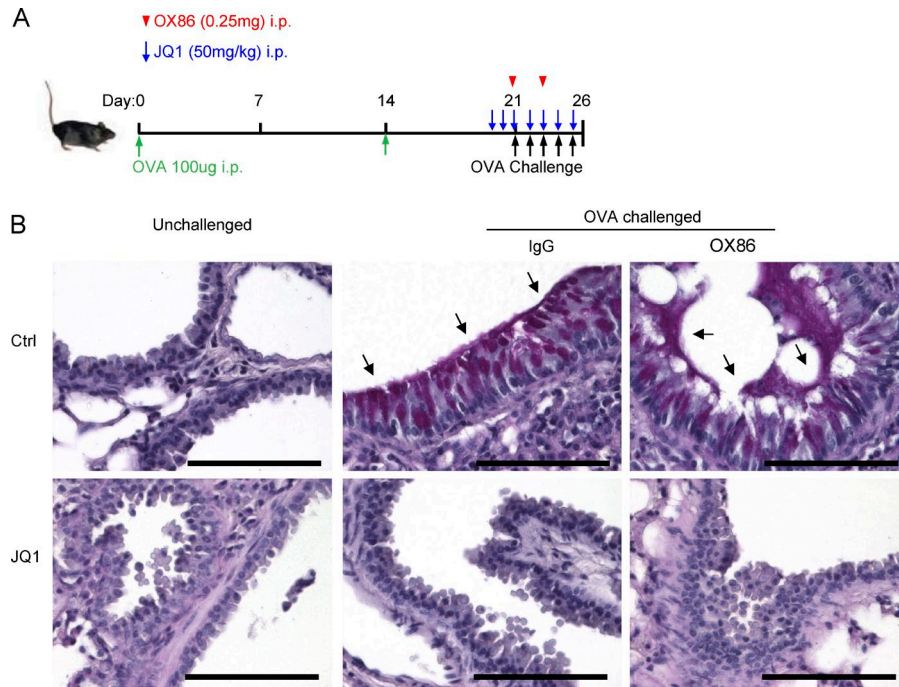

Figure S4. **The role of BET inhibitor JQ1 in allergic airway inflammation in vivo.** **(A)** Schematic representation of OVA immunization and challenge, as well as timing of treatment with JQ1 and OX86. **(B)** PAS staining of mucin-producing cells in the airway epithelia (arrows) during acute allergic lung inflammation, with or without JQ1 treatment, showing striking reduction of PAS<sup>+</sup> cells after treatment (400 $\times$ ). Bars, 100  $\mu$ m. Data are representative of two experiments with five to seven mice per group.

Table S1. qPCR primers and oligos used in this study

| Name                                                          | Forward                   | Reverse                |
|---------------------------------------------------------------|---------------------------|------------------------|
| <b>qPCR primers used for eRNA detection</b>                   |                           |                        |
| <i>II9SEa1</i>                                                | AGACAGATGCTATTTATTCT      | TCCCTCCCCATAGTTCCAAA   |
| <i>II9SEa2</i>                                                | ATAGGTAGGATGGAGCAAAG      | TGTCTCCCTCATGCTGTTCT   |
| <i>II9SEa3</i>                                                | AGTGGTTACAGCACTTGCTG      | CACATGACTGCAGGTGCCCT   |
| <i>II9SEa4</i>                                                | GCCTATTTACCTGGAACCTG      | ATGGTTGCATCCGCATTCTG   |
| <i>II9SEa5</i>                                                | GATGACTGGTCTCCAGGGTG      | CACCCTGGAGACCAGTCATC   |
| <i>II9SEb1</i>                                                | GCAGATGATTAACCTAAGGTCT    | GTGTGCTCAGTTGCAGTGCTC  |
| <i>II9SEb2</i>                                                | GATGGAGTTCTCACACTCTAC     | TTTCTGAGCCATGTGGATATC  |
| <i>II9SEc1</i>                                                | GGCACTGCCTACAATCCTGAT     | GTGAAAGTGAGAAGTCAGTTC  |
| <i>II9SEc2</i>                                                | GACATCAGAGAGGGTACACAG     | GCTCTGTGTGAAGCTAGAGTA  |
| <i>II9SEc3</i>                                                | GCTGAGCACTGTCTGTCTGGA     | AGTACACTAAATCCTGAAGGC  |
| <i>II9SEc4</i>                                                | GAGTCAAGTTGACAAGCAGGA     | TTTACTCAGACATGCTGCTAC  |
| <i>II9SEc5</i>                                                | GGACCACATAGATAGCCAGCA     | GCTTCTGAGTCAAGGATCTTC  |
| <i>II9SEc6</i>                                                | GGCAGTGCTGCGATGTGCAAT     | TGTTAGCATCAACTGCCATG   |
| <i>II9SEc7</i>                                                | GACCTGTCATAAGCAGTTCAT     | GAGGCTTGCTGCCAAGCAGC   |
| <b>ChIP-qPCR primers</b>                                      |                           |                        |
| MIL9-1                                                        | CCATCCTCCACAGCTCTTGGA     | TAGAATGAAAACCTCTGCTGGG |
| MIL9-2                                                        | GCTGGAGTAAAGCTGTCTTGT     | CACCCATAACAGGACCTGGGG  |
| MIL9-3                                                        | ATAGGTAGGATGGAGCAAAG      | TGTCTCCCTCATGCTGTTCT   |
| MIL9-4                                                        | TGACAGTGTGTTGCCCTGCCAT    | TCAACTGGCCACCAGGTTTGA  |
| MIL9-5                                                        | AGTGGCACCTGCCTTGCTA       | CCAGGGTTTAAAGTCACAGCG  |
| MIL9-6                                                        | TCTCTCATTTGCTTGGATGTG     | CTGACCAATGCCACACAGAAA  |
| MIL9-8                                                        | AGCTAGACTGGAAGATGCTG      | GGTAATTGGTGTCTCTGATG   |
| MIL9-9                                                        | AGTCGGGTTCTGAAATACTAA     | CCTGTAACCTACTGTCTATCA  |
| MIL9-10                                                       | CACTCTCAGAATTTGGCTGTA     | ATAGATTAGAGGCCATCAGC   |
| <b>PCR primers for Cas9-mediated gene deletion efficiency</b> |                           |                        |
| II9-SEa                                                       | GCCTATTTACCTGGAACCTG      | ATGGTTGCATCCGCATTCTG   |
| II9-SEb                                                       | AAGTCATCTCCTCACTCCTCAAATG | CAACACATCATTCCCAGCAGAT |
| II9-SEc                                                       | GAGAGGGTACACAGCTTGCAAT    | GACGCCAAGTGTGACTTTGAG  |
| II9-coding                                                    | CTCAATTGGCTCAACTTACA      | CCCTTTGCCATCCTCCAGCAG  |
| <b>PCR primers used for 3C assays</b>                         |                           |                        |
| 1                                                             | GAAGTAAAAGGTATCTGGAA      | TTCCAGATACCTTTTACTTC   |
| 2                                                             | ATAGGTAGGATGGAGCAAAG      | CTTTGCTCCATCCTACCTAT   |
| 3                                                             | AGTTCCCAACACCTTTGGCA      | TGCCAAAGGTGTTGGGAACCT  |
| 4                                                             | AGGGCACCTGCAGTCATGTG      | CACATGACTGCAGGTGCCCT   |
| 5                                                             | TCTCTGCAACACCTCCAGGC      | GCCTGGAGGTGTTGCAGAGA   |
| 6                                                             | GTCTTCATGCATGAAGTTCC      | GGAACCTTCATGCATGAAGAC  |
| 7                                                             | GAGATGCTGAGGGAGTCCAC      | GTGGCACTCCCTCAGCATCTC  |
| 8                                                             | GGTTGGAGACGTTCCCAAGAG     | CTCTTGGGAACGTCTCCAACC  |
| C                                                             | CATCAGAGACCACAATTACC      |                        |
| <b>shRNA oligos used for target gene knockdown</b>            |                           |                        |
| <b>Genes</b>                                                  |                           |                        |
| <i>Brd4</i> 1                                                 | <b>Target sequence</b>    |                        |
| <i>Brd4</i> 2                                                 | GCCGCTCTTTATAAGTGTTCG     |                        |
| <i>Med1</i> 1                                                 | GACAGACGTCTACTACATGC      |                        |
| <i>Med1</i> 2                                                 | GCTCTCAAAGTAACATCTTTG     |                        |
| <i>P300</i> 1                                                 | GCCCTTTAGAAAAGGCAGAACT    |                        |
| <i>P300</i> 2                                                 | GGATACTGTTGTGGCAGAAAG     |                        |
|                                                               | GCACCAGATCTGTGCTCTTCA     |                        |
| <b>shRNA oligos Cas9-mediated target gene deletion</b>        |                           |                        |
| <b>Name</b>                                                   |                           |                        |
| <i>II9SEa-1</i>                                               | <b>Target sequence</b>    |                        |
| <i>II9SEa-2</i>                                               | GGAATAAAGATCCACGGGG       |                        |
| <i>II9SEb-1</i>                                               | GCACTGTTTCTGTTTGTACC      |                        |
| <i>II9SEb-2</i>                                               | GGCATATTAATAGGAAGAG       |                        |
| <i>II9SEc-1</i>                                               | GTGTTTCGAGACCCCTCACA      |                        |
|                                                               | GAGTAATCTTGCTGAAGCAC      |                        |
